# Supplementary material
Source: Springer Nature journal article supplement (https://www.springermedizin.de/resource/supplementary/12960_2004_28_MOESM5_ESM.pdf/9570244)

*Sociological approach*

*Educational approach*

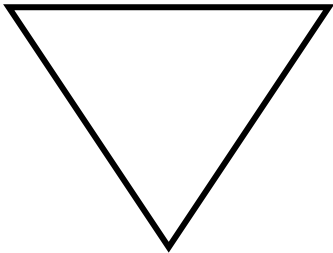

*Public health approach*

Supplement: MOESM5 [file 9570244]
